# Supplementary material for: Single-cell RNA sequencing reveals cellular and molecular heterogeneity in fibrocartilaginous enthesis formation
Source: eLife. 2023 Sep 12;12:e85873. doi: 10.7554/eLife.85873 (PMC10513478; doi:10.7554/eLife.85873)
Supplement: Supplementary file 5. [file elife-85873-supp5.xlsx]

## Sheet: Sheet1
ID	Description	GeneRatio	BgRatio	pvalue	p.adjust	qvalue	geneID	Count	Module
GO:0051216	cartilage development	17/159	216/23062	1.66134e-13	4.25303e-10	3.69692e-10	ENSMUSG00000026147/ENSMUSG00000038259/ENSMUSG00000045672/ENSMUSG00000054252/ENSMUSG00000014158/ENSMUSG00000030607/ENSMUSG00000051910/ENSMUSG00000022094/ENSMUSG00000022025/ENSMUSG00000020846/ENSMUSG00000000142/ENSMUSG00000005583/ENSMUSG00000020583/ENSMUSG00000022483/ENSMUSG00000001288/ENSMUSG00000022676/ENSMUSG00000024098	17	15
GO:0060348	bone development	17/159	258/23062	2.965e-12	3.7952e-09	3.29895e-09	ENSMUSG00000026147/ENSMUSG00000073530/ENSMUSG00000026725/ENSMUSG00000046743/ENSMUSG00000045672/ENSMUSG00000054252/ENSMUSG00000014158/ENSMUSG00000030849/ENSMUSG00000020846/ENSMUSG00000050860/ENSMUSG00000000142/ENSMUSG00000050295/ENSMUSG00000037966/ENSMUSG00000005583/ENSMUSG00000022483/ENSMUSG00000001288/ENSMUSG00000024899	17	15
GO:0061448	connective tissue development	17/159	302/23062	3.60731e-11	2.15625e-08	1.87431e-08	ENSMUSG00000026147/ENSMUSG00000038259/ENSMUSG00000045672/ENSMUSG00000054252/ENSMUSG00000014158/ENSMUSG00000030607/ENSMUSG00000051910/ENSMUSG00000022094/ENSMUSG00000022025/ENSMUSG00000020846/ENSMUSG00000000142/ENSMUSG00000005583/ENSMUSG00000020583/ENSMUSG00000022483/ENSMUSG00000001288/ENSMUSG00000022676/ENSMUSG00000024098	17	15
GO:0001503	ossification	16/159	424/23062	4.26897e-08	1.36607e-05	1.18745e-05	ENSMUSG00000026725/ENSMUSG00000039286/ENSMUSG00000046743/ENSMUSG00000040998/ENSMUSG00000054252/ENSMUSG00000030849/ENSMUSG00000022025/ENSMUSG00000020846/ENSMUSG00000050860/ENSMUSG00000000142/ENSMUSG00000050295/ENSMUSG00000005583/ENSMUSG00000021136/ENSMUSG00000022483/ENSMUSG00000022676/ENSMUSG00000024098	16	15
GO:0030198	extracellular matrix organization	13/159	322/23062	3.90658e-07	8.94022e-05	7.77122e-05	ENSMUSG00000026147/ENSMUSG00000026042/ENSMUSG00000027570/ENSMUSG00000058897/ENSMUSG00000040998/ENSMUSG00000045672/ENSMUSG00000028626/ENSMUSG00000030607/ENSMUSG00000043903/ENSMUSG00000050295/ENSMUSG00000020583/ENSMUSG00000021136/ENSMUSG00000022483	13	15
GO:0043062	extracellular structure organization	13/159	323/23062	4.04642e-07	8.94022e-05	7.77122e-05	ENSMUSG00000026147/ENSMUSG00000026042/ENSMUSG00000027570/ENSMUSG00000058897/ENSMUSG00000040998/ENSMUSG00000045672/ENSMUSG00000028626/ENSMUSG00000030607/ENSMUSG00000043903/ENSMUSG00000050295/ENSMUSG00000020583/ENSMUSG00000021136/ENSMUSG00000022483	13	15
GO:0045229	external encapsulating structure organization	13/159	324/23062	4.19073e-07	8.94022e-05	7.77122e-05	ENSMUSG00000026147/ENSMUSG00000026042/ENSMUSG00000027570/ENSMUSG00000058897/ENSMUSG00000040998/ENSMUSG00000045672/ENSMUSG00000028626/ENSMUSG00000030607/ENSMUSG00000043903/ENSMUSG00000050295/ENSMUSG00000020583/ENSMUSG00000021136/ENSMUSG00000022483	13	15
GO:0007409	axonogenesis	14/159	493/23062	8.61237e-06	0.00146985	0.00127765	ENSMUSG00000026235/ENSMUSG00000026725/ENSMUSG00000031285/ENSMUSG00000027954/ENSMUSG00000058897/ENSMUSG00000040254/ENSMUSG00000054252/ENSMUSG00000029673/ENSMUSG00000030849/ENSMUSG00000020262/ENSMUSG00000000861/ENSMUSG00000017724/ENSMUSG00000005583/ENSMUSG00000042700	14	15
GO:0045667	regulation of osteoblast differentiation	8/159	161/23062	1.64558e-05	0.00247806	0.00215403	ENSMUSG00000026725/ENSMUSG00000039286/ENSMUSG00000040998/ENSMUSG00000000142/ENSMUSG00000005583/ENSMUSG00000021136/ENSMUSG00000022676/ENSMUSG00000024098	8	15
GO:0071864	positive regulation of cell proliferation in bone marrow	3/159	11/23062	5.09505e-05	0.00631994	0.00549356	ENSMUSG00000054252/ENSMUSG00000030849/ENSMUSG00000005583	3	15
GO:0048762	mesenchymal cell differentiation	9/159	244/23062	5.14414e-05	0.00631994	0.00549356	ENSMUSG00000026235/ENSMUSG00000027954/ENSMUSG00000040254/ENSMUSG00000030849/ENSMUSG00000020846/ENSMUSG00000000142/ENSMUSG00000050295/ENSMUSG00000005583/ENSMUSG00000022676	9	15
GO:0072073	kidney epithelium development	7/159	155/23062	0.000102731	0.00906867	0.00788289	ENSMUSG00000045515/ENSMUSG00000026235/ENSMUSG00000046743/ENSMUSG00000040998/ENSMUSG00000030849/ENSMUSG00000050295/ENSMUSG00000005583	7	15
GO:0071838	cell proliferation in bone marrow	3/159	14/23062	0.000110702	0.00944661	0.0082114	ENSMUSG00000054252/ENSMUSG00000030849/ENSMUSG00000005583	3	15
GO:0001654	eye development	11/159	424/23062	0.000180625	0.01445	0.0125605	ENSMUSG00000026042/ENSMUSG00000031285/ENSMUSG00000054252/ENSMUSG00000030849/ENSMUSG00000031561/ENSMUSG00000050295/ENSMUSG00000037966/ENSMUSG00000021136/ENSMUSG00000001288/ENSMUSG00000024098/ENSMUSG00000024268	11	15
GO:0030282	bone mineralization	6/159	131/23062	0.000300405	0.0207848	0.018067	ENSMUSG00000054252/ENSMUSG00000030849/ENSMUSG00000020846/ENSMUSG00000050860/ENSMUSG00000000142/ENSMUSG00000005583	6	15
GO:0050680	negative regulation of epithelial cell proliferation	7/159	188/23062	0.000336533	0.0226717	0.0197072	ENSMUSG00000038259/ENSMUSG00000054252/ENSMUSG00000030849/ENSMUSG00000022025/ENSMUSG00000017724/ENSMUSG00000005583/ENSMUSG00000022676	7	15
GO:0045652	regulation of megakaryocyte differentiation	3/159	21/23062	0.0003904	0.0249856	0.0217186	ENSMUSG00000029359/ENSMUSG00000005583/ENSMUSG00000002565	3	15
GO:0021954	central nervous system neuron development	5/159	97/23062	0.000565739	0.0344831	0.0299742	ENSMUSG00000026235/ENSMUSG00000031285/ENSMUSG00000062232/ENSMUSG00000030849/ENSMUSG00000020262	5	15
GO:0098743	cell aggregation	3/159	25/23062	0.000661611	0.0384937	0.0334604	ENSMUSG00000030607/ENSMUSG00000051910/ENSMUSG00000022483	3	15
GO:0060560	developmental growth involved in morphogenesis	8/159	278/23062	0.000712373	0.0405261	0.0352271	ENSMUSG00000026725/ENSMUSG00000031285/ENSMUSG00000040254/ENSMUSG00000029673/ENSMUSG00000030849/ENSMUSG00000000861/ENSMUSG00000020340/ENSMUSG00000001288	8	15
GO:0048863	stem cell differentiation	8/159	281/23062	0.000763772	0.0424195	0.0368729	ENSMUSG00000040254/ENSMUSG00000051910/ENSMUSG00000030849/ENSMUSG00000069769/ENSMUSG00000017724/ENSMUSG00000050295/ENSMUSG00000005583/ENSMUSG00000022676	8	15
GO:0022612	gland morphogenesis	6/159	157/23062	0.000784037	0.0424195	0.0368729	ENSMUSG00000003282/ENSMUSG00000030849/ENSMUSG00000017724/ENSMUSG00000001288/ENSMUSG00000022676/ENSMUSG00000024098	6	15
GO:0003007	heart morphogenesis	8/159	283/23062	0.000799666	0.0424195	0.0368729	ENSMUSG00000046743/ENSMUSG00000027954/ENSMUSG00000030849/ENSMUSG00000000142/ENSMUSG00000050295/ENSMUSG00000005583/ENSMUSG00000022483/ENSMUSG00000022676	8	15
GO:0035265	organ growth	7/159	218/23062	0.000811936	0.0424195	0.0368729	ENSMUSG00000026147/ENSMUSG00000003282/ENSMUSG00000045672/ENSMUSG00000030849/ENSMUSG00000050295/ENSMUSG00000005583/ENSMUSG00000001288	7	15
GO:0030865	cortical cytoskeleton organization	4/159	64/23062	0.00100216	0.0493369	0.0428858	ENSMUSG00000014158/ENSMUSG00000029449/ENSMUSG00000034930/ENSMUSG00000023008	4	15
GO:0009791	post-embryonic development	9/148	135/23062	2.27371e-07	0.000588435	0.000493514	ENSMUSG00000045005/ENSMUSG00000027523/ENSMUSG00000031229/ENSMUSG00000027684/ENSMUSG00000027808/ENSMUSG00000028053/ENSMUSG00000040856/ENSMUSG00000023031/ENSMUSG00000023951	9	21
GO:0009100	glycoprotein metabolic process	12/148	355/23062	3.29127e-06	0.0042589	0.00357189	ENSMUSG00000038702/ENSMUSG00000026600/ENSMUSG00000031239/ENSMUSG00000027808/ENSMUSG00000029992/ENSMUSG00000030062/ENSMUSG00000020260/ENSMUSG00000031608/ENSMUSG00000032038/ENSMUSG00000021109/ENSMUSG00000021188/ENSMUSG00000023031	12	21
GO:0060009	Sertoli cell development	4/148	22/23062	1.08879e-05	0.00750787	0.00629677	ENSMUSG00000031229/ENSMUSG00000040407/ENSMUSG00000000567/ENSMUSG00000039219	4	21
GO:0006888	endoplasmic reticulum to Golgi vesicle-mediated transport	7/148	119/23062	1.19527e-05	0.00750787	0.00629677	ENSMUSG00000029407/ENSMUSG00000035325/ENSMUSG00000030298/ENSMUSG00000030754/ENSMUSG00000032458/ENSMUSG00000021188/ENSMUSG00000090000	7	21
GO:0072175	epithelial tube formation	8/148	170/23062	1.45052e-05	0.00750787	0.00629677	ENSMUSG00000004768/ENSMUSG00000022995/ENSMUSG00000017009/ENSMUSG00000037225/ENSMUSG00000031628/ENSMUSG00000000567/ENSMUSG00000021109/ENSMUSG00000023951	8	21
GO:0001503	ossification	12/148	424/23062	1.96174e-05	0.00846162	0.00709667	ENSMUSG00000015846/ENSMUSG00000027523/ENSMUSG00000037225/ENSMUSG00000048583/ENSMUSG00000000957/ENSMUSG00000000567/ENSMUSG00000042988/ENSMUSG00000021109/ENSMUSG00000040856/ENSMUSG00000051980/ENSMUSG00000023951/ENSMUSG00000024232	12	21
GO:0043620	regulation of DNA-templated transcription in response to stress	5/148	55/23062	2.73266e-05	0.00884016	0.00741414	ENSMUSG00000015522/ENSMUSG00000032216/ENSMUSG00000021690/ENSMUSG00000021109/ENSMUSG00000023951	5	21
GO:0061458	reproductive system development	10/148	330/23062	5.5976e-05	0.0120722	0.0101248	ENSMUSG00000015846/ENSMUSG00000031229/ENSMUSG00000028053/ENSMUSG00000028364/ENSMUSG00000040407/ENSMUSG00000030059/ENSMUSG00000000567/ENSMUSG00000039219/ENSMUSG00000021589/ENSMUSG00000023951	10	21
GO:0001837	epithelial to mesenchymal transition	7/148	154/23062	6.28471e-05	0.0125114	0.0104932	ENSMUSG00000027654/ENSMUSG00000020260/ENSMUSG00000000567/ENSMUSG00000021109/ENSMUSG00000055065/ENSMUSG00000023951/ENSMUSG00000024232	7	21
GO:0060349	bone morphogenesis	6/148	109/23062	7.4215e-05	0.0137192	0.0115061	ENSMUSG00000004768/ENSMUSG00000027523/ENSMUSG00000003316/ENSMUSG00000000957/ENSMUSG00000000567/ENSMUSG00000021188	6	21
GO:0046886	positive regulation of hormone biosynthetic process	3/148	14/23062	8.9505e-05	0.0154426	0.0129515	ENSMUSG00000015522/ENSMUSG00000048583/ENSMUSG00000021109	3	21
GO:1903358	regulation of Golgi organization	3/148	17/23062	0.000164861	0.0221724	0.0185957	ENSMUSG00000027739/ENSMUSG00000038170/ENSMUSG00000040407	3	21
GO:0001952	regulation of cell-matrix adhesion	6/148	128/23062	0.000179915	0.0221724	0.0185957	ENSMUSG00000017009/ENSMUSG00000031012/ENSMUSG00000027750/ENSMUSG00000037736/ENSMUSG00000000957/ENSMUSG00000023951	6	21
GO:0048592	eye morphogenesis	7/148	187/23062	0.000210402	0.0233907	0.0196176	ENSMUSG00000045005/ENSMUSG00000026837/ENSMUSG00000037225/ENSMUSG00000000567/ENSMUSG00000041592/ENSMUSG00000021109/ENSMUSG00000023951	7	21
GO:0001763	morphogenesis of a branching structure	8/148	249/23062	0.000212062	0.0233907	0.0196176	ENSMUSG00000045005/ENSMUSG00000015846/ENSMUSG00000037225/ENSMUSG00000028364/ENSMUSG00000000957/ENSMUSG00000000567/ENSMUSG00000051980/ENSMUSG00000023951	8	21
GO:0002067	glandular epithelial cell differentiation	5/148	85/23062	0.000220828	0.0233907	0.0196176	ENSMUSG00000045005/ENSMUSG00000015846/ENSMUSG00000037225/ENSMUSG00000000567/ENSMUSG00000021109	5	21
GO:0090287	regulation of cellular response to growth factor stimulus	9/148	319/23062	0.000225954	0.0233907	0.0196176	ENSMUSG00000031012/ENSMUSG00000037225/ENSMUSG00000031609/ENSMUSG00000003316/ENSMUSG00000032216/ENSMUSG00000020176/ENSMUSG00000039219/ENSMUSG00000021109/ENSMUSG00000024232	9	21
GO:0048010	vascular endothelial growth factor receptor signaling pathway	4/148	48/23062	0.000254436	0.0253262	0.0212408	ENSMUSG00000032216/ENSMUSG00000020176/ENSMUSG00000021109/ENSMUSG00000023951	4	21
GO:0043413	macromolecule glycosylation	7/148	200/23062	0.00031669	0.0256123	0.0214808	ENSMUSG00000027808/ENSMUSG00000029992/ENSMUSG00000030062/ENSMUSG00000020260/ENSMUSG00000031608/ENSMUSG00000032038/ENSMUSG00000021188	7	21
GO:0070828	heterochromatin organization	5/148	98/23062	0.000427706	0.0311338	0.0261115	ENSMUSG00000027523/ENSMUSG00000027684/ENSMUSG00000000031/ENSMUSG00000038025/ENSMUSG00000096210	5	21
GO:0032352	positive regulation of hormone metabolic process	3/148	24/23062	0.000474806	0.0317229	0.0266057	ENSMUSG00000015522/ENSMUSG00000048583/ENSMUSG00000021109	3	21
GO:0043536	positive regulation of blood vessel endothelial cell migration	4/148	57/23062	0.000493947	0.0317229	0.0266057	ENSMUSG00000037225/ENSMUSG00000048583/ENSMUSG00000021109/ENSMUSG00000023951	4	21
GO:0051216	cartilage development	7/148	216/23062	0.000502566	0.0317229	0.0266057	ENSMUSG00000027523/ENSMUSG00000037225/ENSMUSG00000003316/ENSMUSG00000055435/ENSMUSG00000000567/ENSMUSG00000021109/ENSMUSG00000021188	7	21
GO:0035265	organ growth	7/148	218/23062	0.000530888	0.0323213	0.0271075	ENSMUSG00000015846/ENSMUSG00000037225/ENSMUSG00000027808/ENSMUSG00000048583/ENSMUSG00000000567/ENSMUSG00000022371/ENSMUSG00000090000	7	21
GO:0035988	chondrocyte proliferation	3/148	25/23062	0.000537023	0.0323213	0.0271075	ENSMUSG00000000957/ENSMUSG00000000567/ENSMUSG00000034243	3	21
GO:1903532	positive regulation of secretion by cell	9/148	364/23062	0.000589588	0.033812	0.0283578	ENSMUSG00000017009/ENSMUSG00000031012/ENSMUSG00000027808/ENSMUSG00000030059/ENSMUSG00000021109/ENSMUSG00000051980/ENSMUSG00000061665/ENSMUSG00000024511/ENSMUSG00000090000	9	21
GO:0002070	epithelial cell maturation	3/148	26/23062	0.000604225	0.033812	0.0283578	ENSMUSG00000045005/ENSMUSG00000021109/ENSMUSG00000023951	3	21
GO:0045667	regulation of osteoblast differentiation	6/148	161/23062	0.000614429	0.033812	0.0283578	ENSMUSG00000027523/ENSMUSG00000037225/ENSMUSG00000000567/ENSMUSG00000040856/ENSMUSG00000023951/ENSMUSG00000024232	6	21
GO:0001649	osteoblast differentiation	7/148	225/23062	0.000640181	0.033812	0.0283578	ENSMUSG00000027523/ENSMUSG00000037225/ENSMUSG00000048583/ENSMUSG00000000567/ENSMUSG00000040856/ENSMUSG00000023951/ENSMUSG00000024232	7	21
GO:0070085	glycosylation	7/148	225/23062	0.000640181	0.033812	0.0283578	ENSMUSG00000027808/ENSMUSG00000029992/ENSMUSG00000030062/ENSMUSG00000020260/ENSMUSG00000031608/ENSMUSG00000032038/ENSMUSG00000021188	7	21
GO:0060575	intestinal epithelial cell differentiation	3/148	27/23062	0.000676568	0.0350192	0.0293702	ENSMUSG00000045005/ENSMUSG00000000567/ENSMUSG00000021109	3	21
GO:0050714	positive regulation of protein secretion	6/148	165/23062	0.000698793	0.0354603	0.0297402	ENSMUSG00000031012/ENSMUSG00000027808/ENSMUSG00000021109/ENSMUSG00000051980/ENSMUSG00000061665/ENSMUSG00000090000	6	21
GO:0061448	connective tissue development	8/148	302/23062	0.000762742	0.0367791	0.0308462	ENSMUSG00000026837/ENSMUSG00000027523/ENSMUSG00000037225/ENSMUSG00000003316/ENSMUSG00000055435/ENSMUSG00000000567/ENSMUSG00000021109/ENSMUSG00000021188	8	21
GO:0051893	regulation of focal adhesion assembly	4/148	64/23062	0.000767416	0.0367791	0.0308462	ENSMUSG00000017009/ENSMUSG00000037736/ENSMUSG00000000957/ENSMUSG00000023951	4	21
GO:0090109	regulation of cell-substrate junction assembly	4/148	64/23062	0.000767416	0.0367791	0.0308462	ENSMUSG00000017009/ENSMUSG00000037736/ENSMUSG00000000957/ENSMUSG00000023951	4	21
GO:0042060	wound healing	9/148	380/23062	0.000799987	0.0371329	0.0311429	ENSMUSG00000026837/ENSMUSG00000017009/ENSMUSG00000027523/ENSMUSG00000031012/ENSMUSG00000037225/ENSMUSG00000057315/ENSMUSG00000032038/ENSMUSG00000021109/ENSMUSG00000023951	9	21
GO:0005979	regulation of glycogen biosynthetic process	3/148	30/23062	0.00092597	0.0371329	0.0311429	ENSMUSG00000029992/ENSMUSG00000048583/ENSMUSG00000020176	3	21
GO:0010962	regulation of glucan biosynthetic process	3/148	30/23062	0.00092597	0.0371329	0.0311429	ENSMUSG00000029992/ENSMUSG00000048583/ENSMUSG00000020176	3	21
GO:1905562	regulation of vascular endothelial cell proliferation	3/148	30/23062	0.00092597	0.0371329	0.0311429	ENSMUSG00000037225/ENSMUSG00000048583/ENSMUSG00000040856	3	21
GO:0007162	negative regulation of cell adhesion	8/148	313/23062	0.000960666	0.0371329	0.0311429	ENSMUSG00000027598/ENSMUSG00000017009/ENSMUSG00000031012/ENSMUSG00000027750/ENSMUSG00000028364/ENSMUSG00000031628/ENSMUSG00000000957/ENSMUSG00000023951	8	21
GO:0051403	stress-activated MAPK cascade	7/148	243/23062	0.00100448	0.0371329	0.0311429	ENSMUSG00000027598/ENSMUSG00000052854/ENSMUSG00000027684/ENSMUSG00000037613/ENSMUSG00000032064/ENSMUSG00000051980/ENSMUSG00000023951	7	21
GO:0019933	cAMP-mediated signaling	4/148	69/23062	0.00101862	0.0371329	0.0311429	ENSMUSG00000027523/ENSMUSG00000057614/ENSMUSG00000000567/ENSMUSG00000023868	4	21
GO:0150116	regulation of cell-substrate junction organization	4/148	69/23062	0.00101862	0.0371329	0.0311429	ENSMUSG00000017009/ENSMUSG00000037736/ENSMUSG00000000957/ENSMUSG00000023951	4	21
GO:0030947	regulation of vascular endothelial growth factor receptor signaling pathway	3/148	31/23062	0.00102038	0.0371329	0.0311429	ENSMUSG00000032216/ENSMUSG00000020176/ENSMUSG00000021109	3	21
GO:0101023	vascular endothelial cell proliferation	3/148	31/23062	0.00102038	0.0371329	0.0311429	ENSMUSG00000037225/ENSMUSG00000048583/ENSMUSG00000040856	3	21
GO:0048732	gland development	10/148	481/23062	0.00111569	0.037458	0.0314156	ENSMUSG00000015846/ENSMUSG00000037225/ENSMUSG00000028053/ENSMUSG00000028364/ENSMUSG00000048583/ENSMUSG00000000567/ENSMUSG00000021109/ENSMUSG00000023031/ENSMUSG00000023830/ENSMUSG00000023951	10	21
GO:0060977	coronary vasculature morphogenesis	3/148	32/23062	0.00112067	0.037458	0.0314156	ENSMUSG00000015846/ENSMUSG00000037225/ENSMUSG00000023951	3	21
GO:0060740	prostate gland epithelium morphogenesis	3/148	33/23062	0.00122697	0.0401951	0.0337111	ENSMUSG00000015846/ENSMUSG00000028364/ENSMUSG00000000567	3	21
GO:1905330	regulation of morphogenesis of an epithelium	4/148	73/23062	0.00125734	0.0405096	0.0339749	ENSMUSG00000015846/ENSMUSG00000037225/ENSMUSG00000000567/ENSMUSG00000023951	4	21
GO:0014068	positive regulation of phosphatidylinositol 3-kinase signaling	4/148	74/23062	0.00132263	0.0409697	0.0343609	ENSMUSG00000037225/ENSMUSG00000032216/ENSMUSG00000000567/ENSMUSG00000023951	4	21
GO:0002052	positive regulation of neuroblast proliferation	3/148	34/23062	0.00133942	0.0409697	0.0343609	ENSMUSG00000037225/ENSMUSG00000021109/ENSMUSG00000023951	3	21
GO:0030282	bone mineralization	5/148	131/23062	0.00158331	0.0455289	0.0381846	ENSMUSG00000015846/ENSMUSG00000000567/ENSMUSG00000042988/ENSMUSG00000021109/ENSMUSG00000040856	5	21
GO:0090279	regulation of calcium ion import	3/148	37/23062	0.00171492	0.0482415	0.0404596	ENSMUSG00000031012/ENSMUSG00000041245/ENSMUSG00000051980	3	21
GO:0001503	ossification	21/131	424/23062	3.57556e-14	9.16772e-11	7.36941e-11	ENSMUSG00000026241/ENSMUSG00000057329/ENSMUSG00000026668/ENSMUSG00000028766/ENSMUSG00000029306/ENSMUSG00000029304/ENSMUSG00000037962/ENSMUSG00000049551/ENSMUSG00000030732/ENSMUSG00000031565/ENSMUSG00000031906/ENSMUSG00000008874/ENSMUSG00000021943/ENSMUSG00000032179/ENSMUSG00000053646/ENSMUSG00000032492/ENSMUSG00000048368/ENSMUSG00000021466/ENSMUSG00000024462/ENSMUSG00000039153/ENSMUSG00000024074	21	22
GO:0110148	biomineralization	10/131	188/23062	1.25324e-07	0.000160665	0.00012915	ENSMUSG00000026668/ENSMUSG00000028766/ENSMUSG00000029306/ENSMUSG00000029304/ENSMUSG00000037962/ENSMUSG00000049551/ENSMUSG00000031565/ENSMUSG00000031906/ENSMUSG00000032492/ENSMUSG00000048368	10	22
GO:0051216	cartilage development	10/131	216/23062	4.53715e-07	0.000374803	0.000301282	ENSMUSG00000026241/ENSMUSG00000027004/ENSMUSG00000040152/ENSMUSG00000037962/ENSMUSG00000030732/ENSMUSG00000031565/ENSMUSG00000031906/ENSMUSG00000032179/ENSMUSG00000032492/ENSMUSG00000039153	10	22
GO:0001649	osteoblast differentiation	10/131	225/23062	6.5935e-07	0.000374803	0.000301282	ENSMUSG00000026241/ENSMUSG00000026668/ENSMUSG00000029304/ENSMUSG00000031565/ENSMUSG00000021943/ENSMUSG00000032492/ENSMUSG00000021466/ENSMUSG00000024462/ENSMUSG00000039153/ENSMUSG00000024074	10	22
GO:0030282	bone mineralization	8/131	131/23062	8.41954e-07	0.000374803	0.000301282	ENSMUSG00000028766/ENSMUSG00000029306/ENSMUSG00000029304/ENSMUSG00000037962/ENSMUSG00000049551/ENSMUSG00000031906/ENSMUSG00000032492/ENSMUSG00000048368	8	22
GO:0031214	biomineral tissue development	9/131	179/23062	8.77073e-07	0.000374803	0.000301282	ENSMUSG00000028766/ENSMUSG00000029306/ENSMUSG00000029304/ENSMUSG00000037962/ENSMUSG00000049551/ENSMUSG00000031565/ENSMUSG00000031906/ENSMUSG00000032492/ENSMUSG00000048368	9	22
GO:0007178	transmembrane receptor protein serine/threonine kinase signaling pathway	12/131	410/23062	4.01402e-06	0.00147028	0.00118187	ENSMUSG00000026668/ENSMUSG00000040152/ENSMUSG00000030732/ENSMUSG00000031906/ENSMUSG00000021943/ENSMUSG00000032340/ENSMUSG00000032179/ENSMUSG00000021065/ENSMUSG00000023047/ENSMUSG00000039153/ENSMUSG00000024074/ENSMUSG00000018822	12	22
GO:0072507	divalent inorganic cation homeostasis	11/131	359/23062	6.69989e-06	0.00190872	0.00153431	ENSMUSG00000057329/ENSMUSG00000017817/ENSMUSG00000053897/ENSMUSG00000037996/ENSMUSG00000028766/ENSMUSG00000029304/ENSMUSG00000049551/ENSMUSG00000031565/ENSMUSG00000032492/ENSMUSG00000079055/ENSMUSG00000015452	11	22
GO:0061448	connective tissue development	10/131	302/23062	9.12643e-06	0.00225493	0.0018126	ENSMUSG00000026241/ENSMUSG00000027004/ENSMUSG00000040152/ENSMUSG00000037962/ENSMUSG00000030732/ENSMUSG00000031565/ENSMUSG00000031906/ENSMUSG00000032179/ENSMUSG00000032492/ENSMUSG00000039153	10	22
GO:0010763	positive regulation of fibroblast migration	4/131	24/23062	9.67402e-06	0.00225493	0.0018126	ENSMUSG00000040152/ENSMUSG00000030774/ENSMUSG00000031565/ENSMUSG00000015452	4	22
GO:0098657	import into cell	9/131	251/23062	1.38454e-05	0.00289319	0.00232567	ENSMUSG00000007097/ENSMUSG00000040152/ENSMUSG00000033965/ENSMUSG00000053897/ENSMUSG00000037996/ENSMUSG00000031596/ENSMUSG00000031906/ENSMUSG00000079055/ENSMUSG00000024990	9	22
GO:0007611	learning or memory	10/131	319/23062	1.46691e-05	0.00289319	0.00232567	ENSMUSG00000026080/ENSMUSG00000007097/ENSMUSG00000037996/ENSMUSG00000029053/ENSMUSG00000049551/ENSMUSG00000029563/ENSMUSG00000030774/ENSMUSG00000079055/ENSMUSG00000059003/ENSMUSG00000015452	10	22
GO:0048638	regulation of developmental growth	11/131	401/23062	1.88116e-05	0.00321553	0.00258478	ENSMUSG00000026241/ENSMUSG00000057329/ENSMUSG00000037624/ENSMUSG00000030774/ENSMUSG00000031565/ENSMUSG00000031661/ENSMUSG00000021983/ENSMUSG00000021466/ENSMUSG00000034460/ENSMUSG00000075707/ENSMUSG00000024990	11	22
GO:1904383	response to sodium phosphate	3/131	11/23062	2.85872e-05	0.0045811	0.00368248	ENSMUSG00000028766/ENSMUSG00000031565/ENSMUSG00000039153	3	22
GO:0006875	cellular metal ion homeostasis	11/131	424/23062	3.13585e-05	0.00472959	0.00380185	ENSMUSG00000057329/ENSMUSG00000007097/ENSMUSG00000017817/ENSMUSG00000053897/ENSMUSG00000037996/ENSMUSG00000029304/ENSMUSG00000049551/ENSMUSG00000031996/ENSMUSG00000032492/ENSMUSG00000079055/ENSMUSG00000022797	11	22
GO:0035265	organ growth	8/131	218/23062	3.58207e-05	0.00487028	0.00391494	ENSMUSG00000026241/ENSMUSG00000057329/ENSMUSG00000037624/ENSMUSG00000040152/ENSMUSG00000030774/ENSMUSG00000031565/ENSMUSG00000031906/ENSMUSG00000024990	8	22
GO:0010761	fibroblast migration	5/131	70/23062	4.93136e-05	0.0054974	0.00441904	ENSMUSG00000040152/ENSMUSG00000030774/ENSMUSG00000031565/ENSMUSG00000021065/ENSMUSG00000015452	5	22
GO:0030509	BMP signaling pathway	7/131	176/23062	6.74323e-05	0.00691585	0.00555926	ENSMUSG00000030732/ENSMUSG00000031906/ENSMUSG00000032340/ENSMUSG00000032179/ENSMUSG00000039153/ENSMUSG00000024074/ENSMUSG00000018822	7	22
GO:0018958	phenol-containing compound metabolic process	6/131	128/23062	9.21583e-05	0.00821452	0.00660318	ENSMUSG00000057329/ENSMUSG00000033965/ENSMUSG00000029819/ENSMUSG00000078651/ENSMUSG00000075707/ENSMUSG00000059003	6	22
GO:0060026	convergent extension	3/131	16/23062	9.50252e-05	0.00821452	0.00660318	ENSMUSG00000027004/ENSMUSG00000031661/ENSMUSG00000018822	3	22
GO:0071772	response to BMP	7/131	187/23062	9.86116e-05	0.00821452	0.00660318	ENSMUSG00000030732/ENSMUSG00000031906/ENSMUSG00000032340/ENSMUSG00000032179/ENSMUSG00000039153/ENSMUSG00000024074/ENSMUSG00000018822	7	22
GO:0008543	fibroblast growth factor receptor signaling pathway	5/131	81/23062	9.93175e-05	0.00821452	0.00660318	ENSMUSG00000040152/ENSMUSG00000008090/ENSMUSG00000030827/ENSMUSG00000031565/ENSMUSG00000039153	5	22
GO:0043583	ear development	8/131	254/23062	0.000104561	0.00837795	0.00673456	ENSMUSG00000057329/ENSMUSG00000027004/ENSMUSG00000020140/ENSMUSG00000031565/ENSMUSG00000021983/ENSMUSG00000032179/ENSMUSG00000049555/ENSMUSG00000034460	8	22
GO:2000027	regulation of animal organ morphogenesis	6/131	133/23062	0.000113847	0.00853226	0.00685859	ENSMUSG00000031565/ENSMUSG00000031661/ENSMUSG00000034460/ENSMUSG00000013089/ENSMUSG00000039153/ENSMUSG00000018822	6	22
GO:0060537	muscle tissue development	11/131	491/23062	0.000116373	0.00853226	0.00685859	ENSMUSG00000057329/ENSMUSG00000037624/ENSMUSG00000017817/ENSMUSG00000029563/ENSMUSG00000030774/ENSMUSG00000031565/ENSMUSG00000032179/ENSMUSG00000004698/ENSMUSG00000034460/ENSMUSG00000044393/ENSMUSG00000024990	11	22
GO:0050808	synapse organization	11/131	495/23062	0.000124941	0.00873263	0.00701966	ENSMUSG00000038473/ENSMUSG00000059203/ENSMUSG00000049551/ENSMUSG00000030774/ENSMUSG00000004558/ENSMUSG00000032076/ENSMUSG00000053646/ENSMUSG00000034460/ENSMUSG00000079055/ENSMUSG00000059003/ENSMUSG00000013089	11	22
GO:0045926	negative regulation of growth	8/131	261/23062	0.00012612	0.00873263	0.00701966	ENSMUSG00000057329/ENSMUSG00000037624/ENSMUSG00000027004/ENSMUSG00000028551/ENSMUSG00000030774/ENSMUSG00000031661/ENSMUSG00000021466/ENSMUSG00000024990	8	22
GO:0010811	positive regulation of cell-substrate adhesion	6/131	138/23062	0.000139406	0.00878957	0.00706544	ENSMUSG00000040152/ENSMUSG00000029053/ENSMUSG00000029304/ENSMUSG00000029819/ENSMUSG00000058297/ENSMUSG00000022425	6	22
GO:0033002	muscle cell proliferation	8/131	266/23062	0.000143667	0.00878957	0.00706544	ENSMUSG00000037624/ENSMUSG00000040152/ENSMUSG00000030774/ENSMUSG00000031565/ENSMUSG00000031906/ENSMUSG00000004558/ENSMUSG00000015452/ENSMUSG00000024990	8	22
GO:0098739	import across plasma membrane	7/131	199/23062	0.000145089	0.00878957	0.00706544	ENSMUSG00000007097/ENSMUSG00000040152/ENSMUSG00000033965/ENSMUSG00000053897/ENSMUSG00000037996/ENSMUSG00000031596/ENSMUSG00000079055	7	22
GO:1901215	negative regulation of neuron death	8/131	267/23062	0.000147407	0.00878957	0.00706544	ENSMUSG00000057329/ENSMUSG00000038473/ENSMUSG00000049551/ENSMUSG00000029819/ENSMUSG00000030827/ENSMUSG00000032340/ENSMUSG00000034460/ENSMUSG00000022661	8	22
GO:0014902	myotube differentiation	6/131	142/23062	0.000162961	0.0090833	0.00730155	ENSMUSG00000057329/ENSMUSG00000030256/ENSMUSG00000003363/ENSMUSG00000032340/ENSMUSG00000004698/ENSMUSG00000034460	6	22
GO:0070997	neuron death	10/131	450/23062	0.000255483	0.0129874	0.0104398	ENSMUSG00000057329/ENSMUSG00000038473/ENSMUSG00000049551/ENSMUSG00000029819/ENSMUSG00000030827/ENSMUSG00000032340/ENSMUSG00000034460/ENSMUSG00000075707/ENSMUSG00000022661/ENSMUSG00000015452	10	22
GO:0031589	cell-substrate adhesion	9/131	370/23062	0.000270974	0.0133611	0.0107402	ENSMUSG00000057329/ENSMUSG00000040152/ENSMUSG00000090210/ENSMUSG00000029053/ENSMUSG00000029304/ENSMUSG00000029819/ENSMUSG00000089661/ENSMUSG00000058297/ENSMUSG00000022425	9	22
GO:0001818	negative regulation of cytokine production	8/131	297/23062	0.000303191	0.014503	0.0116582	ENSMUSG00000040152/ENSMUSG00000074361/ENSMUSG00000025723/ENSMUSG00000031565/ENSMUSG00000004558/ENSMUSG00000004698/ENSMUSG00000022661/ENSMUSG00000015452	8	22
GO:0035567	non-canonical Wnt signaling pathway	4/131	57/23062	0.000311103	0.014503	0.0116582	ENSMUSG00000027004/ENSMUSG00000049551/ENSMUSG00000031661/ENSMUSG00000018822	4	22
GO:0042445	hormone metabolic process	7/131	236/23062	0.000409536	0.0175008	0.0140679	ENSMUSG00000026080/ENSMUSG00000033965/ENSMUSG00000029304/ENSMUSG00000032179/ENSMUSG00000075707/ENSMUSG00000024987/ENSMUSG00000024990	7	22
GO:0010996	response to auditory stimulus	3/131	26/23062	0.000423237	0.0177898	0.0143002	ENSMUSG00000007097/ENSMUSG00000029563/ENSMUSG00000021983	3	22
GO:0090287	regulation of cellular response to growth factor stimulus	8/131	319/23062	0.000487355	0.0195246	0.0156947	ENSMUSG00000040152/ENSMUSG00000008090/ENSMUSG00000030732/ENSMUSG00000031565/ENSMUSG00000032340/ENSMUSG00000039153/ENSMUSG00000024074/ENSMUSG00000018822	8	22
GO:0090596	sensory organ morphogenesis	8/131	321/23062	0.000507821	0.0197281	0.0158583	ENSMUSG00000057329/ENSMUSG00000027004/ENSMUSG00000031565/ENSMUSG00000021983/ENSMUSG00000049555/ENSMUSG00000034460/ENSMUSG00000075707/ENSMUSG00000024990	8	22
GO:0060037	pharyngeal system development	3/131	31/23062	0.0007167	0.0270238	0.0217229	ENSMUSG00000032179/ENSMUSG00000021466/ENSMUSG00000034460	3	22
GO:0055022	negative regulation of cardiac muscle tissue growth	3/131	32/23062	0.000787572	0.0276939	0.0222615	ENSMUSG00000037624/ENSMUSG00000030774/ENSMUSG00000024990	3	22
GO:0061117	negative regulation of heart growth	3/131	32/23062	0.000787572	0.0276939	0.0222615	ENSMUSG00000037624/ENSMUSG00000030774/ENSMUSG00000024990	3	22
GO:1905330	regulation of morphogenesis of an epithelium	4/131	73/23062	0.000799278	0.0276939	0.0222615	ENSMUSG00000031565/ENSMUSG00000031661/ENSMUSG00000034460/ENSMUSG00000013089	4	22
GO:0048738	cardiac muscle tissue development	7/131	270/23062	0.000906871	0.030595	0.0245935	ENSMUSG00000037624/ENSMUSG00000017817/ENSMUSG00000030774/ENSMUSG00000031565/ENSMUSG00000032179/ENSMUSG00000044393/ENSMUSG00000024990	7	22
GO:0050678	regulation of epithelial cell proliferation	9/131	440/23062	0.000939556	0.031286	0.025149	ENSMUSG00000040152/ENSMUSG00000029563/ENSMUSG00000074361/ENSMUSG00000031565/ENSMUSG00000032179/ENSMUSG00000021466/ENSMUSG00000034460/ENSMUSG00000015452/ENSMUSG00000039153	9	22
GO:0006816	calcium ion transport	9/131	449/23062	0.00108214	0.0342545	0.0275352	ENSMUSG00000057329/ENSMUSG00000038473/ENSMUSG00000007097/ENSMUSG00000017817/ENSMUSG00000037996/ENSMUSG00000048200/ENSMUSG00000079055/ENSMUSG00000059003/ENSMUSG00000024617	9	22
GO:0003401	axis elongation	3/131	36/23062	0.0011151	0.0343231	0.0275904	ENSMUSG00000031661/ENSMUSG00000034460/ENSMUSG00000018822	3	22
GO:0198738	cell-cell signaling by wnt	9/131	453/23062	0.00115091	0.0347168	0.0279069	ENSMUSG00000027004/ENSMUSG00000049551/ENSMUSG00000030402/ENSMUSG00000020140/ENSMUSG00000020218/ENSMUSG00000031661/ENSMUSG00000004558/ENSMUSG00000021381/ENSMUSG00000018822	9	22
GO:0030278	regulation of ossification	5/131	139/23062	0.00119943	0.0352108	0.0283039	ENSMUSG00000057329/ENSMUSG00000037962/ENSMUSG00000049551/ENSMUSG00000048368/ENSMUSG00000039153	5	22
GO:0033273	response to vitamin	3/131	37/23062	0.00120848	0.0352108	0.0283039	ENSMUSG00000028766/ENSMUSG00000029304/ENSMUSG00000039153	3	22
GO:0098528	skeletal muscle fiber differentiation	2/131	10/23062	0.00139859	0.0391003	0.0314305	ENSMUSG00000004698/ENSMUSG00000034460	2	22
GO:0071695	anatomical structure maturation	7/131	297/23062	0.00156974	0.0423665	0.034056	ENSMUSG00000026241/ENSMUSG00000057329/ENSMUSG00000037962/ENSMUSG00000031565/ENSMUSG00000053646/ENSMUSG00000032492/ENSMUSG00000039153	7	22
GO:0022898	regulation of transmembrane transporter activity	7/131	303/23062	0.00175845	0.0455422	0.0366087	ENSMUSG00000057329/ENSMUSG00000038473/ENSMUSG00000007097/ENSMUSG00000017817/ENSMUSG00000046182/ENSMUSG00000059003/ENSMUSG00000015452	7	22
GO:0061333	renal tubule morphogenesis	4/131	92/23062	0.00188866	0.0479459	0.0385409	ENSMUSG00000057329/ENSMUSG00000020140/ENSMUSG00000021466/ENSMUSG00000034460	4	22
GO:0010830	regulation of myotube differentiation	3/131	44/23062	0.00200112	0.0487891	0.0392188	ENSMUSG00000057329/ENSMUSG00000030256/ENSMUSG00000004698	3	22
GO:0061138	morphogenesis of a branching epithelium	6/131	229/23062	0.00200151	0.0487891	0.0392188	ENSMUSG00000057329/ENSMUSG00000030774/ENSMUSG00000031565/ENSMUSG00000021466/ENSMUSG00000034460/ENSMUSG00000013089	6	22
GO:0072132	mesenchyme morphogenesis	6/136	55/23062	8.60762e-07	0.00184289	0.00161008	ENSMUSG00000029763/ENSMUSG00000015957/ENSMUSG00000042812/ENSMUSG00000032440/ENSMUSG00000069763/ENSMUSG00000022883	6	25
GO:0003206	cardiac chamber morphogenesis	8/136	151/23062	3.25283e-06	0.00348215	0.00304225	ENSMUSG00000028780/ENSMUSG00000010797/ENSMUSG00000015957/ENSMUSG00000042812/ENSMUSG00000032440/ENSMUSG00000021650/ENSMUSG00000075254/ENSMUSG00000022883	8	25
GO:0001570	vasculogenesis	6/136	97/23062	2.39617e-05	0.0090508	0.00790741	ENSMUSG00000016494/ENSMUSG00000042812/ENSMUSG00000032440/ENSMUSG00000069763/ENSMUSG00000022475/ENSMUSG00000075254	6	25
GO:0003156	regulation of animal organ formation	4/136	34/23062	4.67712e-05	0.0125171	0.0109358	ENSMUSG00000016918/ENSMUSG00000010797/ENSMUSG00000015957/ENSMUSG00000022883	4	25
GO:0010464	regulation of mesenchymal cell proliferation	4/136	42/23062	0.000108835	0.0211833	0.0185072	ENSMUSG00000010797/ENSMUSG00000015957/ENSMUSG00000042812/ENSMUSG00000032440	4	25
GO:0060841	venous blood vessel development	3/136	20/23062	0.000212474	0.0308177	0.0269245	ENSMUSG00000028780/ENSMUSG00000042812/ENSMUSG00000075254	3	25
GO:0010463	mesenchymal cell proliferation	4/136	56/23062	0.000335059	0.0448351	0.0391711	ENSMUSG00000010797/ENSMUSG00000015957/ENSMUSG00000042812/ENSMUSG00000032440	4	25
